# Supplementary material for: FeCoS2 polyhedral spherical nanoparticle decorated nitrogen doped hollow carbon nanofibers as high-performance self-supporting anodes for K-ion storage
Source: Royal Society of Chemistry journal article supplement (doi:10.1039/d2dt02832h), 2022-01-01
Supplement: d2dt02832h1.pdf [file d2dt02832h1.pdf]

**FeCoS<sub>2</sub> polyhedral spherical nanoparticles decorated Nitrogen doped hollow carbon nanofibers as high-performance self-supporting anode for K-ion storage**

Haoshan Xu <sup>a</sup>, Shuhong Huang <sup>a</sup>, Yang Yang <sup>a</sup>, Jintao Chen <sup>a</sup>, Lingxun Liang <sup>b</sup>, Jun Zhang <sup>b</sup>, Ling Li <sup>a, \*</sup>, Xiaohui Zhao <sup>a, \*</sup>, Wenming Zhang <sup>a, \*</sup>

<sup>a</sup> *Province-Ministry Co-construction Collaborative Innovation Center of Hebei Photovoltaic Technology, College of Physics Science and Technology, Hebei University, Baoding, Hebei 071002, China.*

<sup>b</sup> *Drilling and Production Technology Research Institute of Liaohe Oilfield, PetroChina Liao he Oilfield Company, Panjin, Liaoning 124000, China.*

**Corresponding author at:**

E-mail: lilinghbu@163.com (L. Li), xhzhao@hbu.edu.cn (X. Zhao),  
wmzhang@hbu.edu.cn (W. Zhang).

### Figures Captions:

**Fig. S1.** SEM images of (a) pure nanofibers, (b) an magnified SEM of pure nanofibers, (c) carbonized nanofibers, (d) an magnified SEM of carbonized nanofibers, (e) FeCoS<sub>2</sub>@N-CNFs and (f) an magnified SEM of (e).

**Fig. S2.** SEM images of (a) pure coaxial nanofibers, (b) an magnified SEM of pure coaxial nanofibers, (c) carbonized hollow carbon nanofibers, (d) an magnified SEM of carbonized hollow carbon nanofibers.

**Fig. S3.** Energy dispersive spectrometer (EDS) of FeCoS<sub>2</sub>@N-HCNFs.

**Fig. S4.** (a) Nitrogen adsorption-desorption isotherm curve and (b) pore diameter distribution image of the FeCoS<sub>2</sub>@N-CNFs. (c) Nitrogen adsorption-desorption isotherm curve and (d) pore diameter distribution image of the HCNTs.

**Fig. S5.** Galvanostatic discharge/charge curves for the initial five cycles at 100 mA g<sup>-1</sup> for (a) the FeCoS<sub>2</sub>@N-CNFs and (b) the HCNTs electrodes.

**Fig. S6.** Nyquist plot of EIS profiles of FeCoS<sub>2</sub>@N-HCNFs, FeCoS<sub>2</sub>@N-CNFs and HCNFs anodes after 25 cycles.

**Fig. S7.** Relationship between real impedance ( $Z'$ ) and radial frequency ( $\omega^{-1/2}$ ).

**Fig. S8.** Reaction mechanism diagram of FeCoS<sub>2</sub>@N-HCNFs negative electrode.

**Fig. S9.** (a) CV curves of FeCoS<sub>2</sub>@N-CNFs at various scan rate. (b) The connection between peak current and scan rate in KIBs is used to calculate the b value. (c) At a scan rate of 0.5 mV s<sup>-1</sup> in KIBs, the CV curve of FeCoS<sub>2</sub>@N-CNFs with the pseudocapacitive percentage represented by the covered areas. (d) Capacitive contribution percentage at various scan rate.

**Fig. S10.** TEM and HRTEM images of FeCoS<sub>2</sub>@N-HCNFs electrode (a, d) discharge to 0.64 V, (b, e) discharge to 0.01 V, and (e, f) charge to 1.18V.

**Fig. S11.** SEM images of (a, b) fresh electrode, (c, d) FeCoS<sub>2</sub>@N-HCNFs electrode after 5 cycles at 100 mA g<sup>-1</sup> and (e, f) FeCoS<sub>2</sub>@N-HCNFs electrode after 50 cycles at 100 mA g<sup>-1</sup>.

**Tables Captions:**

**Table S1.** The comparison of electrochemical performance between FeCoS<sub>2</sub>@N-HCNFs and other previously reported anode materials for KIBs.

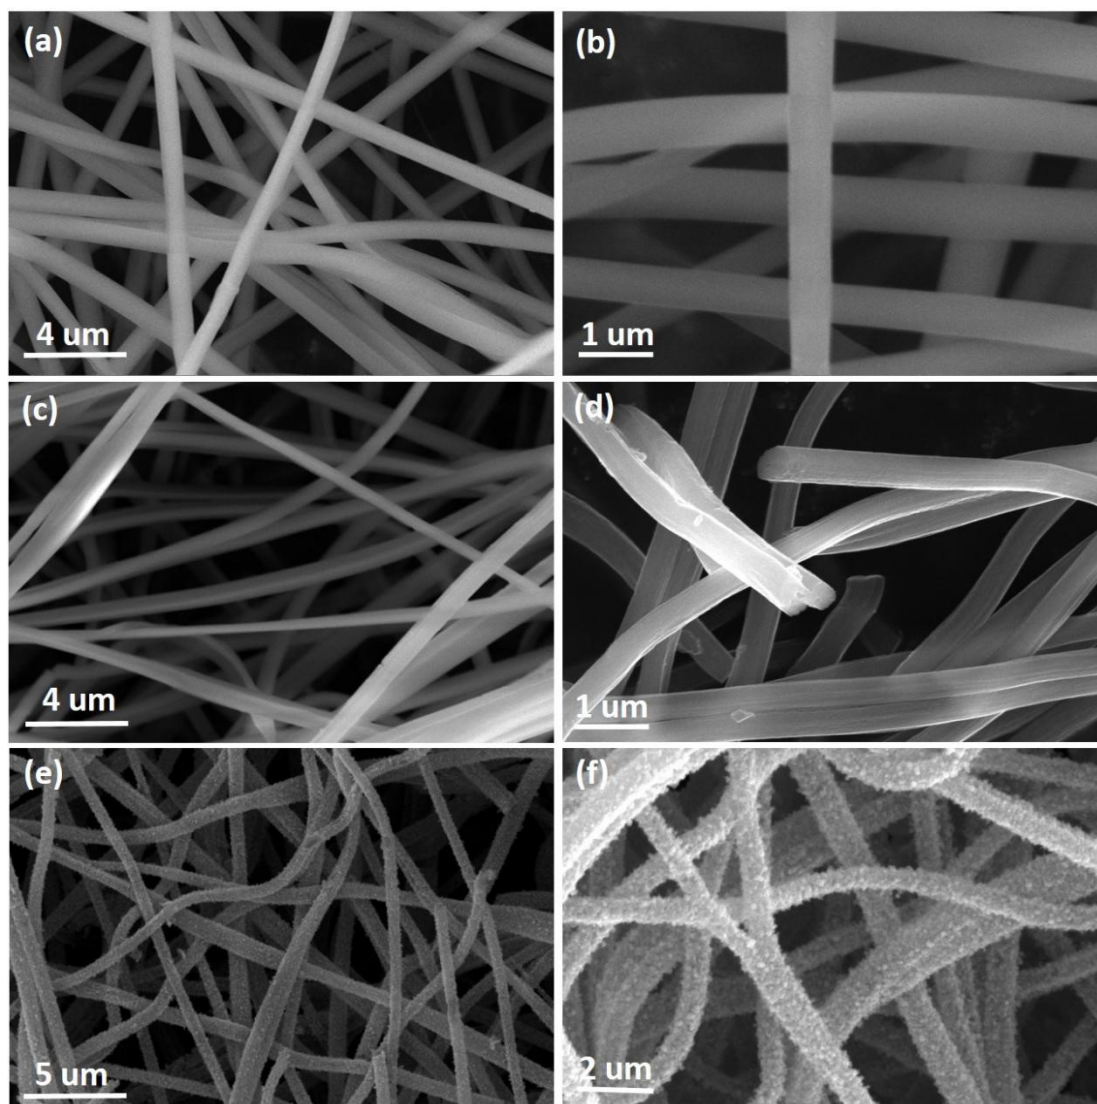

**Fig. S1.** SEM images of (a) pure nanofibers, (b) an magnified SEM of pure nanofibers, (c) carbonized nanofibers, (d) an magnified SEM of carbonized nanofibers, (e) FeCoS<sub>2</sub>@N-CNFs and (f) an magnified SEM of (e).

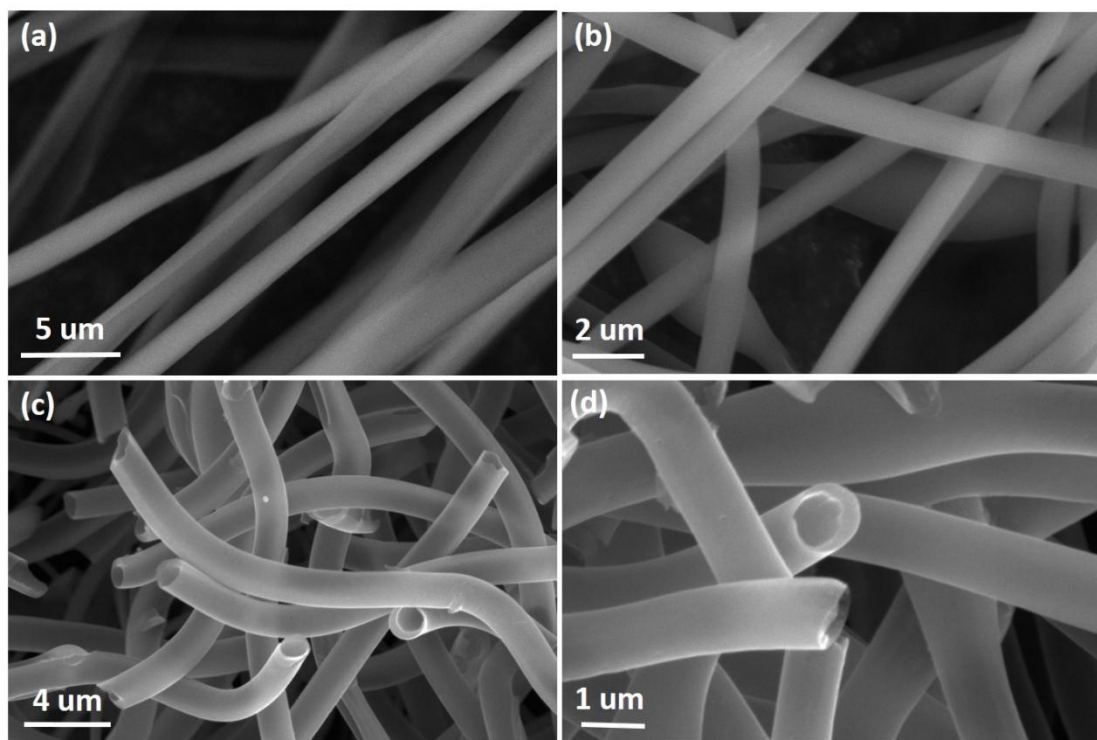

**Fig. S2.** SEM images of (a) pure coaxial nanofibers, (b) an magnified SEM of pure coaxial nanofibers, (c) carbonized hollow carbon nanofibers, (d) an magnified SEM of carbonized hollow carbon nanofibers.

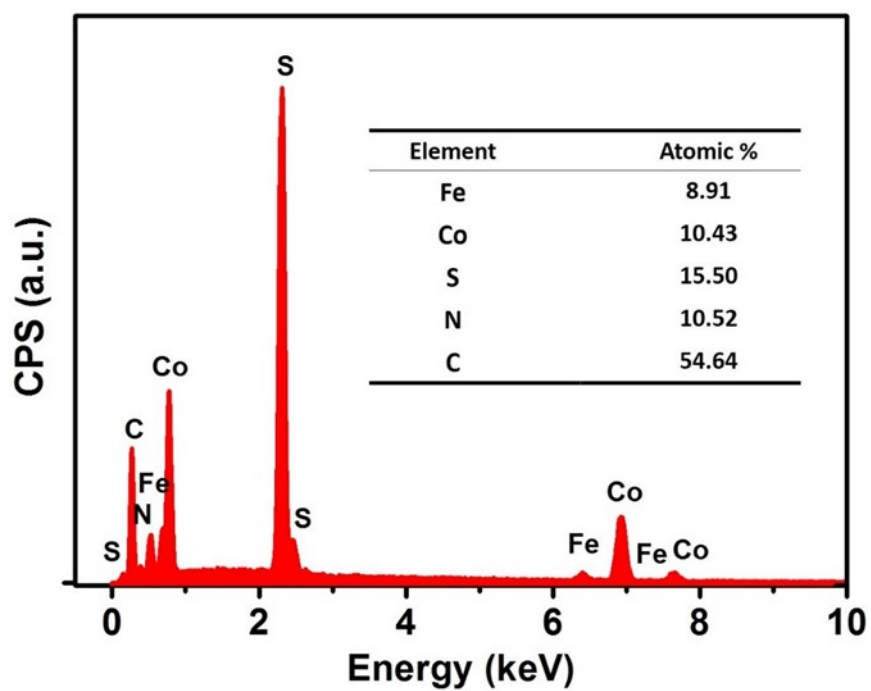

**Fig. S3.** Energy dispersive spectrometer (EDS) of FeCoS<sub>2</sub>@N-HCNFs.

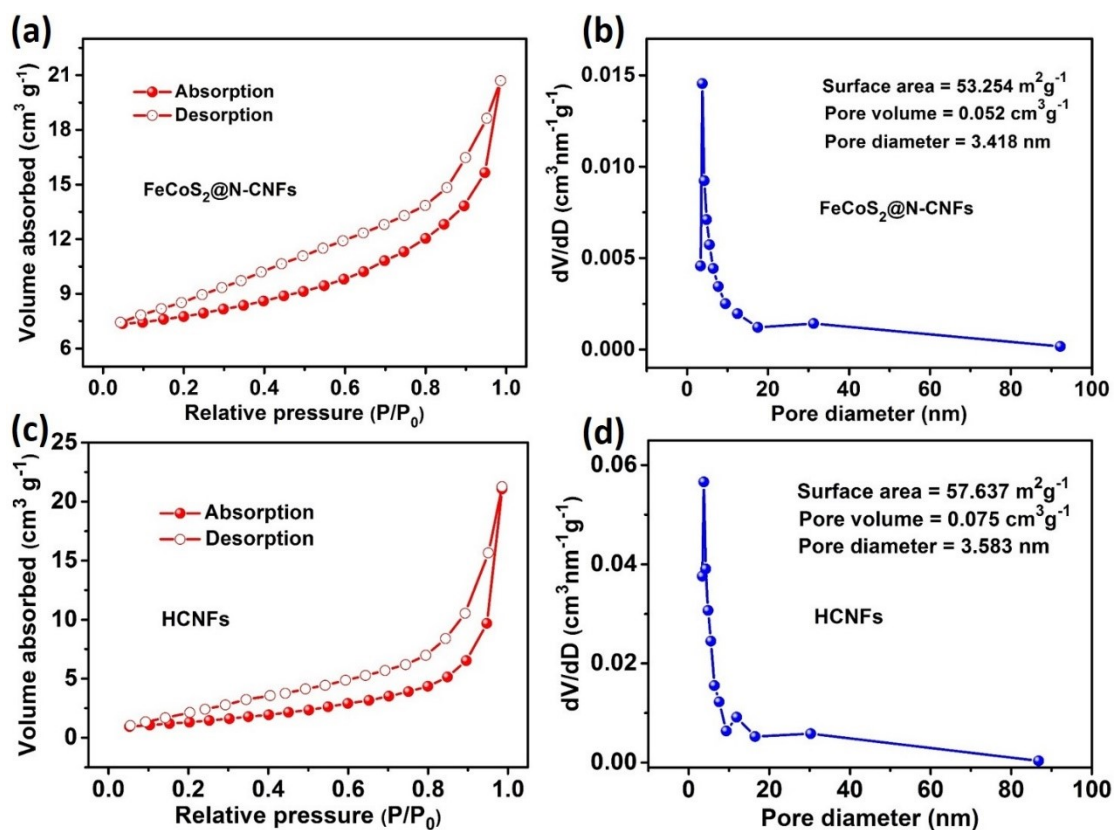

**Fig. S4.** (a) Nitrogen adsorption-desorption isotherm curve and (b) pore diameter distribution image of FeCoS<sub>2</sub>@N-CNFs. (c) Nitrogen adsorption-desorption isotherm curve and (d) pore diameter distribution image of HCNFs

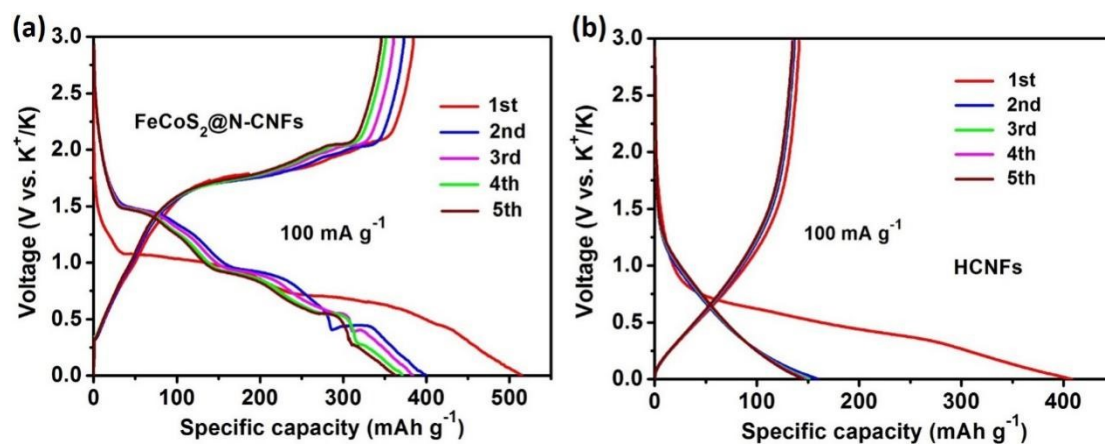

**Fig. S5.** Galvanostatic discharge/charge curves for the initial five cycles at 100 mA g<sup>-1</sup> for (a) the FeCoS<sub>2</sub>@N-CNFs and (b) the HCNFs electrodes.



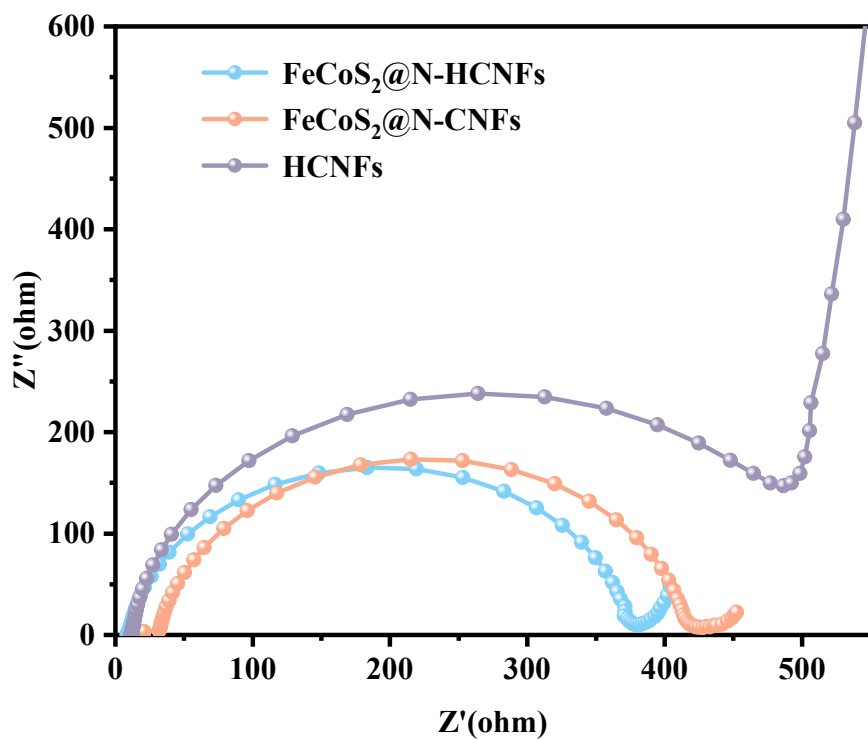

**Fig. S6.** Nyquist plot of EIS profiles of  $\text{FeCoS}_2@N\text{-HCNFs}$ ,  $\text{FeCoS}_2@N\text{-CNFs}$  and HCNFs anodes after 25 cycles.

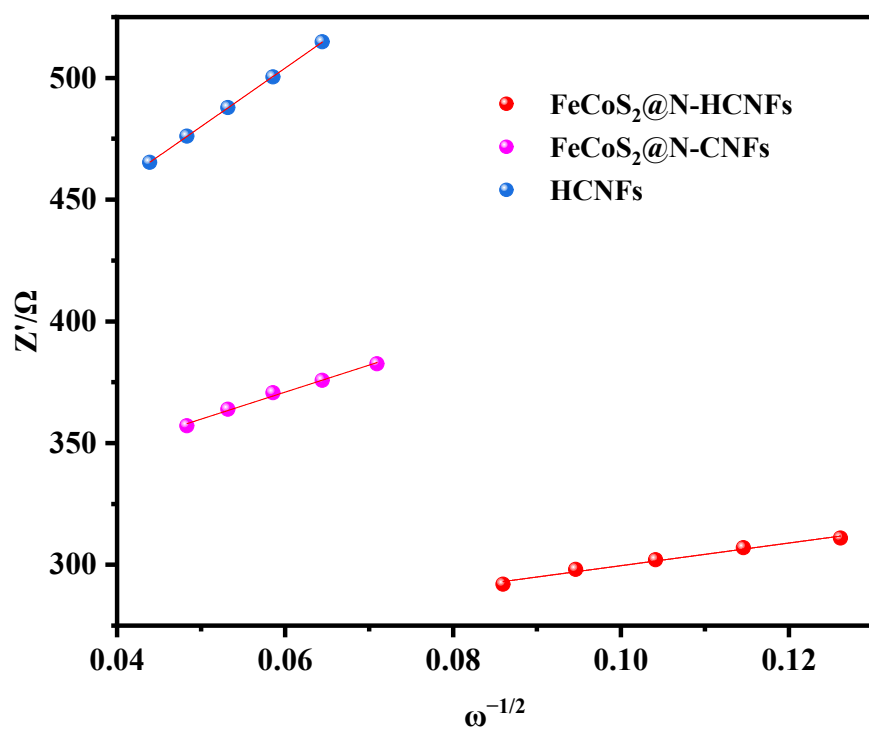

**Fig. S7.** Relationship between real impedance ( $Z'$ ) and radial frequency ( $\omega^{-1/2}$ ).

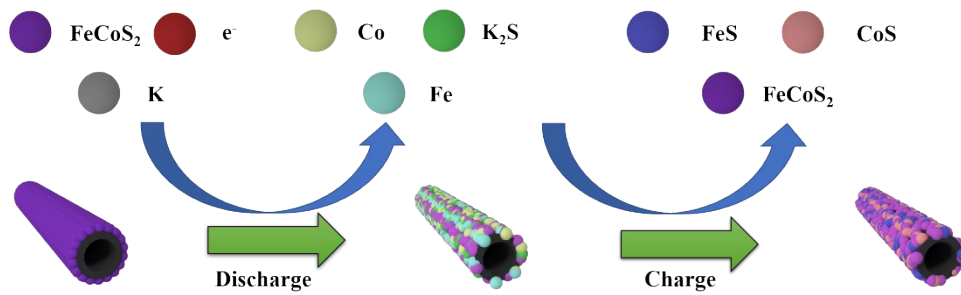

**Fig. S8.** Reaction mechanism diagram of FeCoS<sub>2</sub>@N-HCNFs negative electrode.

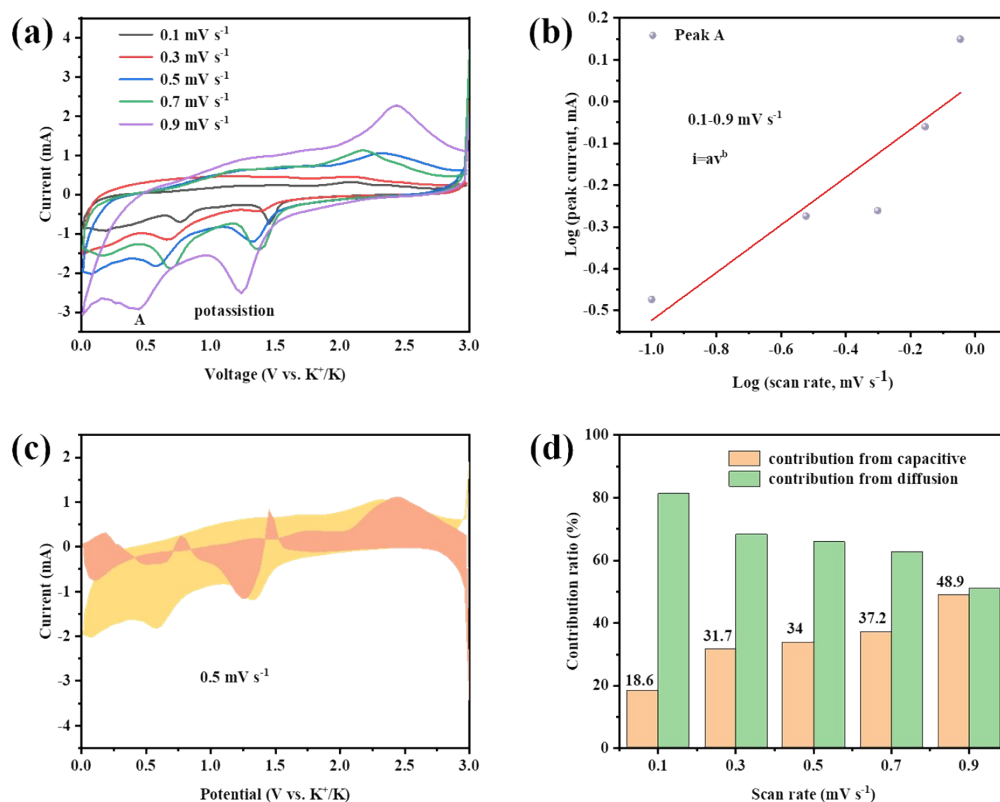

**Fig. S9.** (a) CV curves of FeCoS<sub>2</sub>@N-CNFs at various scan rate. (b) The connection between peak current and scan rate in KIBs is used to calculate the b value. (c) At a scan rate of 0.5 mV s<sup>-1</sup> in KIBs, the CV curve of FeCoS<sub>2</sub>@N-CNFs with the pseudocapacitive percentage represented by the covered areas. (d) Capacitive contribution percentage at various scan rate.

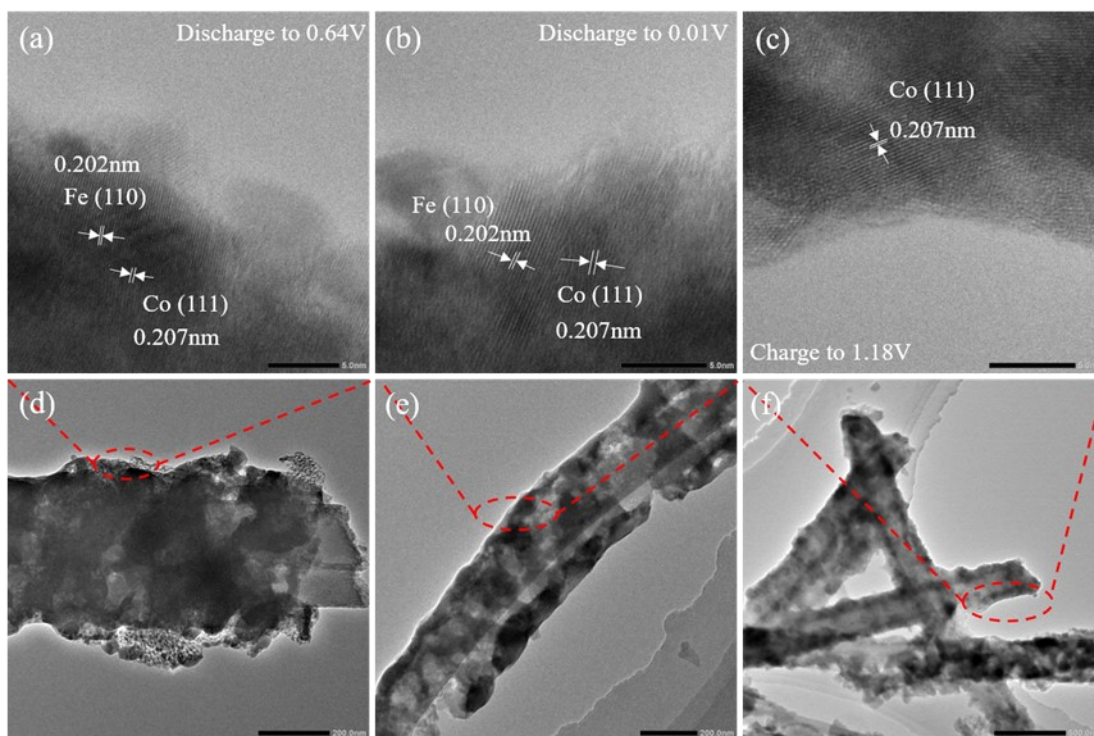

**Fig. S10.** TEM and HRTEM images of  $\text{FeCoS}_2@\text{N-HCNFs}$  electrode (a, d) discharge to 0.64 V, (b, e) discharge to 0.01 V, and (e, f) charge to 1.18V.

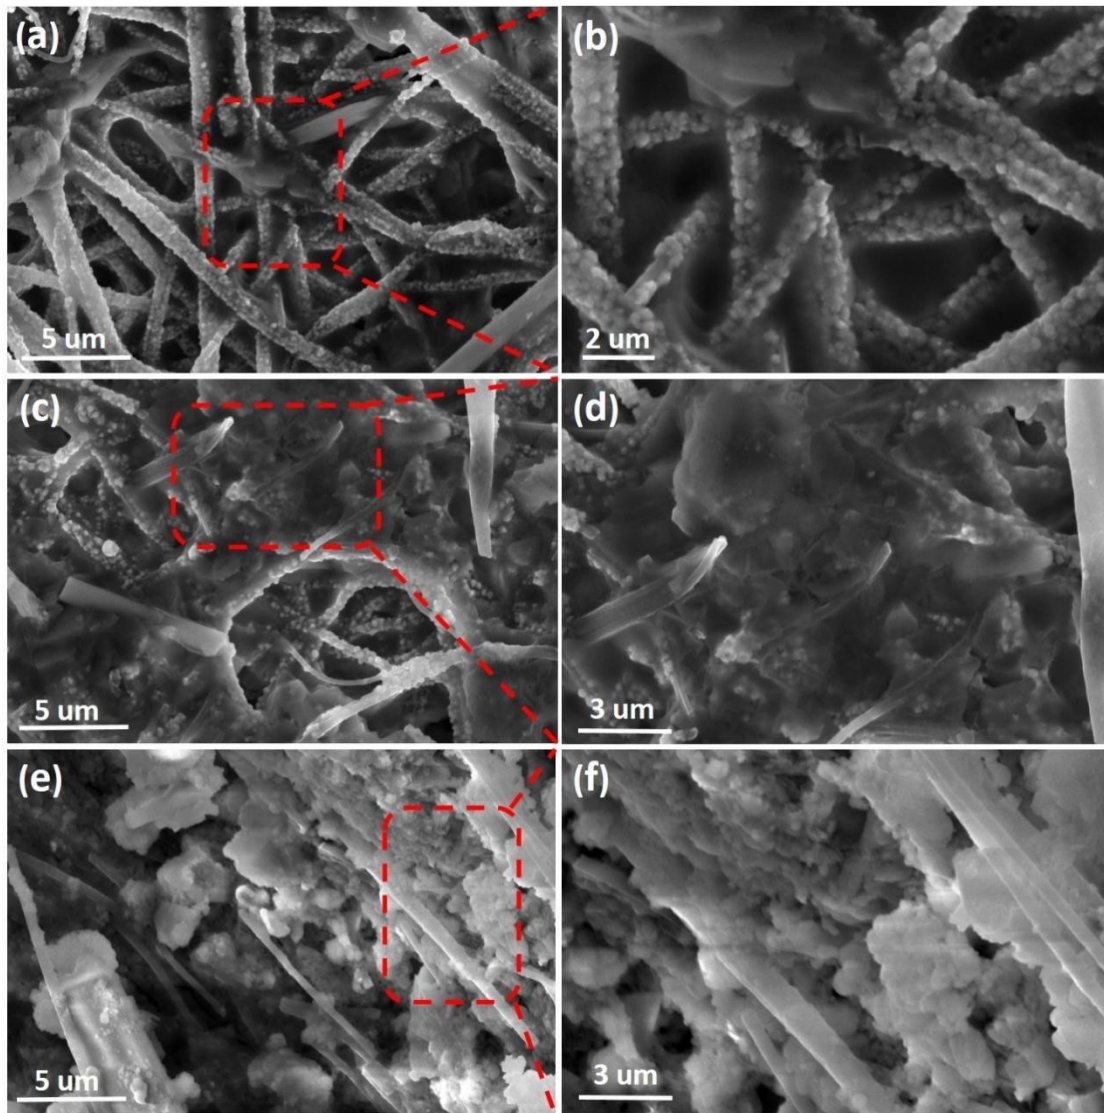

**Fig. S11.** SEM images of (a, b) fresh electrode, (c, d)  $\text{FeCoS}_2@\text{N-HCNFs}$  electrode after 5 cycles at  $100 \text{ mA g}^{-1}$  and (e, f)  $\text{FeCoS}_2@\text{N-HCNFs}$  electrode after 50 cycles at  $100 \text{ mA g}^{-1}$ .

**Table S1.** Comparison of the electrochemical potassium-storage properties of different carbon-based self-supporting anode materials in this work and previously reported nanomaterials.

| Materials (Mass loading)                                     | Current density (mA g <sup>-1</sup> ) | Reversible capacity (mAh g <sup>-1</sup> ) | Rate capacity (mAh g <sup>-1</sup> )                                                                                                                                                                                                                                                  | Ref/Year  |
|--------------------------------------------------------------|---------------------------------------|--------------------------------------------|---------------------------------------------------------------------------------------------------------------------------------------------------------------------------------------------------------------------------------------------------------------------------------------|-----------|
| <b>NHC (0.6-1.4 mg/cm<sup>2</sup>)</b>                       | 100                                   | 293.5 mA h g <sup>-1</sup> (50 cycles)     | 204 mA h g <sup>-1</sup> (2000 mA g <sup>-1</sup> )                                                                                                                                                                                                                                   | [1]/2019  |
| <b>NCNTs (0.7 mg cm<sup>-2</sup>)</b>                        | 50                                    | 254.7 mA h g <sup>-1</sup> (300 cycles)    | 180 mA h g <sup>-1</sup> (500 mA g <sup>-1</sup> )<br>102 mA h g <sup>-1</sup> (2000 mA g <sup>-1</sup> )                                                                                                                                                                             | [2]/2018  |
| <b>HCNTs (3.08 mg cm<sup>-2</sup>)</b>                       | 100                                   | 232 mA h g <sup>-1</sup> (500 cycles)      | 162 mA h g <sup>-1</sup> (1600 mA g <sup>-1</sup> )                                                                                                                                                                                                                                   | [3]/2018  |
| <b>Porous CNF (1.5 mg/cm<sup>2</sup>)</b>                    | 20                                    | 270 mA h g <sup>-1</sup> (80 cycles)       | 190mA h g <sup>-1</sup> (2000 mA g <sup>-1</sup> )<br>140 mA h g <sup>-1</sup> (5000 mA g <sup>-1</sup> )<br>100 mA h g <sup>-1</sup> (7700mA g <sup>-1</sup> )                                                                                                                       | [4]/2017  |
| <b>OMC</b>                                                   | 200                                   | 197.8 mA h g <sup>-1</sup> (200 cycles)    | 286.4 mA h g <sup>-1</sup> (50 mA g <sup>-1</sup> )<br>255.1 mA h g <sup>-1</sup> (100 mA g <sup>-1</sup> )<br>186.3 mA h g <sup>-1</sup> (500 mA g <sup>-1</sup> )<br>144.2mA h g <sup>-1</sup> (1000 mA g <sup>-1</sup> )                                                           | [5]/2018  |
| <b>N-FLG</b>                                                 | 100                                   | 210 mA h g <sup>-1</sup> (100cycles)       | 350 mA h g <sup>-1</sup> (50 mA g <sup>-1</sup> )                                                                                                                                                                                                                                     | [6]/2016  |
| <b>HINCA (1.1~2 mg cm<sup>-2</sup>)</b>                      | 140                                   | 250 mA h g <sup>-1</sup> (150 cycles)      | 340 mA h g <sup>-1</sup> (28 mA g <sup>-1</sup> )<br>300 mA h g <sup>-1</sup> (56 mA g <sup>-1</sup> )                                                                                                                                                                                | [7]/2018  |
| <b>Graphite</b>                                              | 140                                   | 100 mA h g <sup>-1</sup> (50 cycles)       | 80 mA h g <sup>-1</sup> (270 mA g <sup>-1</sup> )                                                                                                                                                                                                                                     | [8]/2015  |
| <b>CNTs/GCF</b>                                              | 100                                   | 226 mA h g <sup>-1</sup> (800 cycles)      | 254 mA h g <sup>-1</sup> (50 mA g <sup>-1</sup> )<br>233 mA h g <sup>-1</sup> (100 mA g <sup>-1</sup> )<br>204 mA h g <sup>-1</sup> (200 mA g <sup>-1</sup> )<br>113 mA h g <sup>-1</sup> (500 mA g <sup>-1</sup> )<br>74 mA h g <sup>-1</sup> (1000 mA g <sup>-1</sup> )             | [9]/2019  |
| <b>NCSCNT (1 mg/cm<sup>2</sup>)</b>                          | 50                                    | 236 mA h g <sup>-1</sup> (100 cycles)      | 150mA h g <sup>-1</sup> (200 mA g <sup>-1</sup> )<br>98 mA h g <sup>-1</sup> ( 600 mA g <sup>-1</sup> )<br>75 mA h g <sup>-1</sup> (1000mA g <sup>-1</sup> )                                                                                                                          | [10]/2018 |
| <b>rGO/CNT-30%</b>                                           | 50                                    | 223 mA h g <sup>-1</sup> (200 cycles)      | 246 mA h g <sup>-1</sup> (20 mA g <sup>-1</sup> )<br>201 mA h g <sup>-1</sup> (30 mA g <sup>-1</sup> )<br>179 mA h g <sup>-1</sup> (50 mA g <sup>-1</sup> )<br>110 mA h g <sup>-1</sup> (100 mA g <sup>-1</sup> )                                                                     | [11]/2019 |
| <b>FeCoS<sub>2</sub>@N-HCNFs (0.8-1.5 mg/cm<sup>2</sup>)</b> | 100                                   | 238 mA h g <sup>-1</sup> (200 cycles)      | 384.3 mA h g <sup>-1</sup> (100 mA g <sup>-1</sup> )<br>327.8 mA h g <sup>-1</sup> (200 mA g <sup>-1</sup> )<br>273.6 mA h g <sup>-1</sup> (400 mA g <sup>-1</sup> )<br>228.7 mA h g <sup>-1</sup> (800 mA g <sup>-1</sup> )<br>180.9 mA h g <sup>-1</sup> (1600 mA g <sup>-1</sup> ) | This work |

## References

- [1] W.X. Yang, J.H. Zhou, S. Wang, W.Y. Zhang, Z.C. Wang, F. Lv, K. Wang, Q. Sun, S.J. Guo, Freestanding film made by necklace-like N-doped hollow carbon with hierarchical pores for high-performance potassium-ion storage, *Energy Environ. Sci.* 12 (2019) 1605-1612.
- [2] P.X. Xiong, X.X. Zhao, Y.H. Xu, Nitrogen-doped carbon nanotubes derived from metal-organic frameworks for potassium-ion battery anodes, *ChemSusChem.* 11(1) (2018) 202–208.
- [3] Y.S. Wang, Z.P. Wang, Z.P. Wang, Y.J. Chen, H. Zhang, M. Yousaf, H.S. Wu, M.C. Zou, A.Y. Cao, R.P.S. Han, Hyperporous sponge interconnected by hierarchical carbon nanotubes as a high-performance potassium-ion battery anode, *Adv. Mater.* 30(32) (2018) 1802074.
- [4] X.X. Zhao, P.X. Xiong, J.F. Meng, Y.Q. Liang, J.W. Wang, Y.H. Xu, High Rate and Long Cycle Life Porous Carbon Nanofiber Paper Anodes for Potassium-Ion Batteries, *J. Mater. Chem. A* 36(5) (2017) 19237-19244.
- [5] W. Wang, J.H. Zhou, Z.P. Wang, L.Y. Zhao, P.H. Li, Y. Yang, C. Yang, H.X. Huang, S.J. Guo, Short-Range Order in Mesoporous Carbon Boosts Potassium-Ion Battery Performance, *Adv. Energy Mater.* 8(5) (2018), 1701648.
- [6] Keith Share, Adam P. Cohn, Rachel Carter, Bridget Rogers, Cary L. Pint, Role of Nitrogen-Doped Graphene for Improved High-Capacity Potassium Ion Battery Anodes, *ACS Nano* 10(25) (2016), 9738–9744.
- [7] D.S. Bin, X.J. Lin, Y.G. Sun, Y.S. Xu, K. Zhang, A.M. Cao, L.J. Wan, Engineering Hollow Carbon Architecture for High-Performance K-Ion Battery Anode,



- J. Am. Chem. Soc. 140(2018), 7127–7134.
- [8] Z.L. Jian, W. Luo, X.L. Ji, Carbon electrodes for K-Ion batteries, J. Am. Chem. Soc. 137(36) (2015) 11566-11569.
- [9] S.F. Zeng, X.F. Zhou, B. Wang, Y.Z. Feng, R. Xu, H.B. Zhang, S.M. Peng, Y. Yu, Freestanding CNT-modified graphitic carbon foam as a flexible anode for potassium ion batteries, J. Mater. Chem. A 26(7) (2019) 15774-15781.
- [10] X.X. Zhao, Y.F. Tang, C.L. Ni, J.W. Wang, A. Star, Y.H. Xu, Free-standing nitrogen-doped cup-stacked carbon nanotube mats for potassium-ion battery anodes, ACS Appl. Energy Mater. 1(4) (2018) 1703–1707.
- [11] S.T. Peng, L.C. Wang, Z.Q. Zhu, K. Han, Electrochemical performance of reduced graphene oxide/carbon nanotube hybrid papers as binder-free anodes for potassium-ion batteries, J. Phys. Chem. Solids. 138 (2020) 109296.
